# Supplementary material for: Environmental Streptococcus uberis Associated with Clinical Mastitis in Dairy Cows: Virulence Traits, Antimicrobial and Biocide Resistance, and Epidemiological Typing
Source: MDPI journal article supplement (doi:10.3390/ani11071849), 2021-06-22
Supplement: s1 [file s1]

**Table S1.**Oligonucleotide primer sequences used for PCR assays

| Primer use                            | Target gene             | Nucleotide sequence (5'→3')                                  | Annealing temperature (°C) | Amplicon size (bp) | References                   |
|---------------------------------------|-------------------------|--------------------------------------------------------------|----------------------------|--------------------|------------------------------|
| <b>Streptococci identification</b>    |                         |                                                              |                            |                    |                              |
| <i>Streptococci</i> species           | <i>tuf</i>              | F: GTACAGTTGCTTCAGGACGTATC<br>R: ACGTTCGATTTTCATCACGTTG      | 50                         | 196                | [28]                         |
| <i>S. uberis</i>                      | 16S rRNA                | F:GTACCCTATTTAAAAGGGGCAAAT<br>R:CTCCGATGTACCGAAGTAAAGCTCT    | 49.5                       | 854                | [29]                         |
| <b>Virulence related genes</b>        |                         |                                                              |                            |                    |                              |
| CAMP factor                           | <i>cfu</i>              | F:TATCCCGATTTGCAGCCTAC<br>R:CCTGGTCAACTTGTGCAACTG            | 50                         | 205                | [11]                         |
| Oligopeptide binding protein          | <i>opp</i>              | F:GGCCTAACCAAAACGAAACA<br>R:GGCTCTGGAATTGCTGAAAG             | 54                         | 419                | [9]                          |
| Adhesion molecule                     | <i>sua</i>              | F:ACGCAAGGTGCTCAAGAGTT<br>R:TGAACAAGCGATTTCGTCAAG            | 58                         | 776                | Accession number<br>DQ232760 |
| Plasminogen activator                 | <i>pauA</i>             | F:TGCTACTCAACCATCAAAGGTTGC<br>R:TAGCAGTCTCAGTAGGATGAGTGA     | 57                         | 439                |                              |
| Streptokinase activator               | <i>skc</i>              | F:TCCGGATTTTGGGTCCTTAGCCA<br>R:AGTCGACTTTGCGCCTGATGCAC       | 52                         | 475                | [30]                         |
| <b>Antimicrobial resistance genes</b> |                         |                                                              |                            |                    |                              |
| Penicillins                           | <i>blaZ</i>             | F: AAGAGATTTCCTATGCTTC<br>R: GCTTGACCACTTTTATCAGC            | 45                         | 517                | [31]                         |
| Phenicol                              | <i>fexA</i>             | F: GTACTTGTAGGTGCAATTACGGCTGA<br>R: CGCATCTGAGTAGGACATAGCGTC | 56                         | 1272               | [32]                         |
| Aminoglycosides                       | <i>aac(6')aph (2'')</i> | F: GAAGTACGCAGAAGAGA<br>R: ACATGGCAAGCTCTAGGA                | 54                         | 491                | [33]                         |
| Tetracyclines                         | <i>tet(M)</i>           | F: GTGGACAAAGGTACAACGAG<br>R: CGGTAAAGTTCGTACACAC            | 50                         | 406                | [34]                         |
|                                       | <i>tet(O)</i>           | F: AACTTAGGCATTCTGGCTCAC<br>R: TCCCACTGTTCCATATCGTCA         | 56                         | 515                | [35]                         |
|                                       | <i>tet(L)</i>           | F: TCGTTAGCGTGCTGTCATTC<br>R: GTATCCCACCAATGTAGCCG           | 50                         | 267                | [34]                         |
|                                       | <i>tet(K)</i>           | F: TCGATAGGAACAGCAGTA<br>R: CAGCAGATCCTACTCCTT               | 44                         | 169                | [34]                         |
|                                       | <i>erm(A)</i>           | F: GTTCAAGAACAAATCAATACAGAG<br>R: GGATCAGGAAAAGGACATTTTAC    | 48                         | 421                | [36]                         |
| Macrolides                            | <i>erm(B)</i>           | F: CATTTAACGACGAAACTGGC<br>R: GGAACATCTGTGGTATGGCG           | 51                         | 425                | [37]                         |
|                                       | <i>erm(C)</i>           | F: ATCTTTGAAATCGGCTCAGG<br>R: CAAACCCGTATTCCACGATT           | 47                         | 295                | [38]                         |
| Sulphonamide                          | <i>sulI</i>             | F: CGGCGTGGGCTACCTGAACG<br>R: GCCGATCGCGTGAAGTTCCG           | 60                         | 433                | [39]                         |
| Trimethoprim                          | <i>dfrA</i>             | F: TGGTAGCTATATCGAAGAATGGAGT<br>R: TATGTTAGAGGCGAAGTCTTGGGTA | 60                         | 425                | [40]                         |
| <b>Biocide resistance genes</b>       |                         |                                                              |                            |                    |                              |
| Quaternary ammonium compounds         | <i>qacA/B</i>           | F: GCAGAAAGTGCAGAGTTCG<br>R: CCAGTCCAATCATGCCTG              | 53                         | 361                | [41]                         |
|                                       | <i>qacC/D</i>           | F: GCCATAAGTACTGAAGTTATTGGA<br>R: GACTACGGTTGTTAAGACTAAACCT  | 53                         | 195                | [41]                         |
|                                       | <i>qacEDI</i>           | F:TAAGCCCTACACAAATTGGGAGATAT<br>R:GCCTCCGCAGCGACTTCCACG      | 58                         | 362                | [42]                         |
| <b>PCR-RFLP</b>                       |                         |                                                              |                            |                    |                              |
|                                       | 16S rRNA                | F:GAGAGTTTGATCCTGGCTCAGGA<br>R:CGGGTGTTACAACTCTCGTGGT        | 55                         | 1400               | [29]                         |

PCR-RFLP, polymerase chain reaction- restriction fragment length polymorphism; bp, base pair
