# Supplementary material for: Environmental Streptococcus uberis Associated with Clinical Mastitis in Dairy Cows: Virulence Traits, Antimicrobial and Biocide Resistance, and Epidemiological Typing
Source: MDPI journal article supplement (doi:10.3390/ani11071849), 2021-06-22
Supplement: s1 [file s1]

## Supplementary Materials

**Table S1.** Oligonucleotide primer sequences used for PCR assays.

**Table S2 a and b.** Significance and correlations among pairs of the of the four features under study.

**Table S3.** Calculated binary distances among isolates based on the presence or absence of the four-studied features.

**Figure S1.** RFLP-PCR analysis of 16S rRNA gene of representative *S. uberis* isolates showed unique patterns. Lanes 1-10: *S. uberis* type I isolates, M: molecular weight DNA marker, P: positive control, N: negative control.
