# Supplementary material for: Environmental Streptococcus uberis Associated with Clinical Mastitis in Dairy Cows: Virulence Traits, Antimicrobial and Biocide Resistance, and Epidemiological Typing
Source: Animals (Basel). 2021 Jun 22;11(7):1849. doi: 10.3390/ani11071849 (PMC8300258; doi:10.3390/ani11071849)
Supplement: Supplementary file 1 [file animals-11-01849-s001.zip]

Archive with 5 entries (5 files):
- Figure S1.jpg
- Supplementary Materials.pdf
- Table S2.xlsx
- Table S3.xlsx
- Table-S1.pdf
