# Supplementary material for: Environmental Streptococcus uberis Associated with Clinical Mastitis in Dairy Cows: Virulence Traits, Antimicrobial and Biocide Resistance, and Epidemiological Typing
Source: Animals (Basel). 2021 Jun 22;11(7):1849. doi: 10.3390/ani11071849 (PMC8300258; doi:10.3390/ani11071849)
Supplement: Supplementary file 1 [file animals-11-01849-s001.zip › Table S2.xlsx]

## Sheet: R value correlation
Table S2 a. Correlations among pairs of the of the four features under study.
	sua	pauA	skc	cfu	opp	AX	AMC	CFP	S	CIP	TE	E	SXT	P	AMP	GEN	NEO	K	C	blaZ	fexA	aac(6')aph (2'')	tet(M)	tet(L)	tet(K)	erm(B)	sul1	qac/ED1	qacA/B	qacC/D
sua	1	-0.0360518	0.120702	0.120702	-0.124936	-0.0749076	-0.00536056	0.162802	-0.0189525	-0.0928477	-0.241225	0.171523	-0.227444	-0.0814735	0.0916093	-0.0645439	0.013865	0.0666818	0.414897	0.267932	0.167885	-0.0264519	-0.144206	-0.158568	0.0400596	0.171523	-0.178791	-0.00846478	0.115348	0.0216645
pauA	-0.0360518	1	0.317412	0.317412	-0.0436728	-0.118786	-0.0880705	0.0115789	-0.0943564	-0.03698	0.210835	-0.0115789	-0.0203568	-0.139071	-0.286281	0.0663747	-0.0103542	0.0483744	0.0281092	-0.0535269	0.0196116	0.0050978	0.122347	0.144355	0.0326357	-0.0115789	-0.086883	-0.139071	-0.123523	-0.175655
skc	0.120702	0.317412	1	0.403704	-0.190866	-0.109563	0.20528	0.0869756	0.099794	-0.0222222	0.08981	0.0730595	-0.0122329	0.178538	0.177093	0.258311	-0.00622211	0.304374	0.264122	0.284896	0.205398	0.00306339	0.0735215	0.0867467	0.0196116	0.0730595	-0.0522102	0.0911685	0.0156269	0.0222222
cfu	0.120702	0.317412	0.403704	1	0.138378	-0.109563	0.20528	0.0869756	-0.108866	0.062963	0.0160375	0.0730595	0.0581064	0.0911685	-0.0556579	-0.00379869	-0.0777764	0.0683986	0.193485	0.214438	0.205398	-0.137853	0.14398	-0.0379517	0.0196116	0.0730595	-0.0522102	0.0911685	-0.164083	-0.062963
opp	-0.124936	-0.0436728	-0.190866	0.138378	1	0.239535	0.0206619	-0.112055	0.00584406	-0.190866	0.0743827	-0.0941259	0.197003	-0.0424149	-0.17818	0.0424149	-0.0227127	-0.0205616	0.145081	0.0263114	0.0679634	-0.064463	-0.064463	0.20955	0.103874	-0.0941259	0.127935	0.0701477	0.0570431	-0.0286299
AX	-0.0749076	-0.118786	-0.109563	-0.109563	0.239535	1	0.152389	-0.180883	0.304969	0.119523	0.112136	-0.106035	0.191903	0.0578888	-0.0136072	0.0987515	-0.030677	-0.0153285	0.03579	0.0466836	0.00603682	-0.0796367	-0.0164766	-0.0194404	0.0293005	-0.106035	0.217493	0.0578888	0.0770456	0.185924
AMC	-0.00536056	-0.0880705	0.20528	0.20528	0.0206619	0.152389	1	0.259111	0.282843	0.20528	0.277778	0.0873748	0.0317821	0.217124	0.245388	0.161198	-0.10777	0.0947758	-0.0744723	0.114078	0.00291606	-0.00795893	-0.00795893	0.206593	0.0792594	0.0873748	0.0132986	-0.00986928	-0.196233	-0.057735
CFP	0.162802	0.0115789	0.0869756	0.0869756	-0.112055	-0.180883	0.259111	1	0.230089	0.0869756	0.156672	0.127451	0.0258544	0.135593	-0.0190114	0.192685	0.0467572	0.0770991	0.138474	-0.0230205	-0.0158146	0.175531	0.0431634	0.0509277	-0.147375	0.127451	-0.00576975	0.299733	0.0513762	0.153077
S	-0.0189525	-0.0943564	0.099794	-0.108866	0.00584406	0.304969	0.282843	0.230089	1	-0.00453609	0.259272	-0.0340873	0.112367	0.0186097	0.0123939	-0.0186097	0.0571537	0.14241	-0.00376142	0.101301	-0.0371154	0.0150075	0.187594	0.119523	-0.0880705	-0.0340873	0.0902741	0.0186097	0.0765559	-0.099794
CIP	-0.0928477	-0.03698	-0.0222222	0.062963	-0.190866	0.119523	0.20528	0.0869756	-0.00453609	1	0.0160375	-0.00695805	0.198785	0.265908	0.177093	0.0835711	0.0653322	-0.0889181	-0.300976	0.14398	-0.336718	0.0735215	-0.0673947	-0.16265	0.0196116	-0.00695805	0.230339	0.178538	-0.164083	0.192593
TE	-0.241225	0.210835	0.08981	0.0160375	0.0743827	0.112136	0.277778	0.156672	0.259272	0.0160375	1	0.189814	0.272796	0.0855337	-0.0438192	-0.00986928	-0.0161655	0.109585	-0.231396	0.00795893	0.0641533	0.00795893	0.618144	0.225374	0.181164	0.189814	0.29257	-0.0657952	-0.0372166	-0.0160375
E	0.171523	-0.0115789	0.0730595	0.0730595	-0.0941259	-0.106035	0.0873748	0.127451	-0.0340873	-0.00695805	0.189814	1	-0.0919267	0.028546	0.0190114	-0.028546	-0.0467572	0.0706742	0.0605824	0.0230205	0.0885615	0.0230205	0.155388	-0.0509277	-0.135094	1	-0.126935	0.110616	-0.0513762	0.0869756
SXT	-0.227444	-0.0203568	-0.0122329	0.0581064	0.197003	0.191903	0.0317821	0.0258544	0.112367	0.198785	0.272796	-0.0919267	1	-0.0219566	-0.158764	-0.12233	0.0950482	0.0593022	-0.185124	0.273188	0.0917517	-0.0177066	0.215009	0.0134304	0.0107958	-0.0919267	0.826719	-0.0219566	-0.0161294	-0.0581064
P	-0.0814735	-0.139071	0.178538	0.0911685	-0.0424149	0.0578888	0.217124	0.135593	0.0186097	0.265908	0.0855337	0.028546	-0.0219566	1	0.427274	0.254545	0.123379	0.149659	0.0514491	0.469199	0.242898	0.180139	-0.0366561	0.0278035	0.125157	0.028546	0.0934484	0.372727	0.150927	0.43305
AMP	0.0916093	-0.286281	0.177093	-0.0556579	-0.17818	-0.0136072	0.245388	-0.0190114	0.0123939	0.177093	-0.0438192	0.0190114	-0.158764	0.427274	1	0.0501658	-0.0155839	0.099672	0.0825153	0.216228	0.00306671	0.0237153	-0.0725408	-0.0666612	0.083354	0.0190114	-0.0825153	0.307914	0.161894	0.288409
GEN	-0.0645439	0.0663747	0.258311	-0.00379869	0.0424149	0.0987515	0.161198	0.192685	-0.0186097	0.0835711	-0.00986928	-0.028546	-0.12233	0.254545	0.0501658	1	0.316957	0.173043	0.0934484	0.108921	0.0748264	0.542511	-0.180139	0.227989	-0.125157	-0.028546	-0.0934484	0.254545	0.033391	0.265908
NEO	0.013865	-0.0103542	-0.00622211	-0.0777764	-0.0227127	-0.030677	-0.10777	0.0467572	0.0571537	0.0653322	-0.0161655	-0.0467572	0.0950482	0.123379	-0.0155839	0.316957	1	0.0191513	0.0343967	0.119225	0.0575103	0.888614	0.000857735	0.0592036	0.04759	-0.0467572	0.0842718	0.270158	0.205646	0.220885
K	0.0666818	0.0483744	0.304374	0.0683986	-0.0205616	-0.0153285	0.0947758	0.0770991	0.14241	-0.0889181	0.109585	0.0706742	0.0593022	0.149659	0.099672	0.173043	0.0191513	1	0.165426	0.207436	0.392794	0.0122576	0.0122576	-0.0750939	0.124751	0.0706742	-0.0349758	0.149659	0.200812	-0.0683986
C	0.414897	0.0281092	0.264122	0.193485	0.145081	0.03579	-0.0744723	0.138474	-0.00376142	-0.300976	-0.231396	0.0605824	-0.185124	0.0514491	0.0825153	0.0934484	0.0343967	0.165426	1	0.197291	0.57704	0.0220153	-0.15326	-0.134873	0.099381	0.0605824	-0.179966	0.341244	0.13714	0.159702
blaZ	0.267932	-0.0535269	0.284896	0.214438	0.0263114	0.0466836	0.114078	-0.0230205	0.101301	0.14398	0.00795893	0.0230205	0.273188	0.469199	0.216228	0.108921	0.119225	0.207436	0.197291	1	0.17453	0.0675676	-0.0489865	-0.0807183	0.142385	0.0230205	0.270111	0.107874	0.220807	0.137853
fexA	0.167885	0.0196116	0.205398	0.205398	0.0679634	0.00603682	0.00291606	-0.0158146	-0.0371154	-0.336718	0.0641533	0.0885615	0.0917517	0.242898	0.00306671	0.0748264	0.0575103	0.392794	0.57704	0.17453	1	0.0464174	0.17453	-0.197162	0.114902	0.0885615	0.129369	0.0840358	0.182323	0.0269374
aac(6')aph (2'')	-0.0264519	0.0050978	0.00306339	-0.137853	-0.064463	-0.0796367	-0.00795893	0.175531	0.0150075	0.0735215	0.00795893	0.0230205	-0.0177066	0.180139	0.0237153	0.542511	0.888614	0.0122576	0.0220153	0.0675676	0.0464174	1	-0.107264	0.125562	0.0180234	0.0230205	-0.0220153	0.324669	0.146486	0.278769
tet(M)	-0.144206	0.122347	0.0735215	0.14398	-0.064463	-0.0164766	-0.00795893	0.0431634	0.187594	-0.0673947	0.618144	0.155388	0.215009	-0.0366561	-0.0725408	-0.180139	0.000857735	0.0122576	-0.15326	-0.0489865	0.17453	-0.107264	1	-0.286998	-0.2307	0.155388	0.270111	-0.108921	-0.0764745	-0.00306339
tet(L)	-0.158568	0.144355	0.0867467	-0.0379517	0.20955	-0.0194404	0.206593	0.0509277	0.119523	-0.16265	0.225374	-0.0509277	0.0134304	0.0278035	-0.0666612	0.227989	0.0592036	-0.0750939	-0.134873	-0.0807183	-0.197162	0.125562	-0.286998	1	-0.0765559	-0.0509277	-0.0719321	0.0278035	-0.0171566	-0.0867467
tet(K)	0.0400596	0.0326357	0.0196116	0.0196116	0.103874	0.0293005	0.0792594	-0.147375	-0.0880705	0.0196116	0.181164	-0.135094	0.0107958	0.125157	0.083354	-0.125157	0.04759	0.124751	0.099381	0.142385	0.114902	0.0180234	-0.2307	-0.0765559	1	-0.135094	0.025297	-0.0290544	0.0390748	-0.0196116
erm(B)	0.171523	-0.0115789	0.0730595	0.0730595	-0.0941259	-0.106035	0.0873748	0.127451	-0.0340873	-0.00695805	0.189814	1	-0.0919267	0.028546	0.0190114	-0.028546	-0.0467572	0.0706742	0.0605824	0.0230205	0.0885615	0.0230205	0.155388	-0.0509277	-0.135094	1	-0.126935	0.110616	-0.0513762	0.0869756
sul1	-0.178791	-0.086883	-0.0522102	-0.0522102	0.127935	0.217493	0.0132986	-0.00576975	0.0902741	0.230339	0.29257	-0.126935	0.826719	0.0934484	-0.0825153	-0.0934484	0.0842718	-0.0349758	-0.179966	0.270111	0.129369	-0.0220153	0.270111	-0.0719321	0.025297	-0.126935	1	-0.123898	-0.062631	0.122847
qacED1	-0.00846478	-0.139071	0.0911685	0.0911685	0.0701477	0.0578888	-0.00986928	0.299733	0.0186097	0.178538	-0.0657952	0.110616	-0.0219566	0.372727	0.307914	0.254545	0.270158	0.149659	0.341244	0.107874	0.0840358	0.324669	-0.108921	0.0278035	-0.0290544	0.110616	-0.123898	1	0.243086	0.52042
qacA/B	0.115348	-0.123523	0.0156269	-0.164083	0.0570431	0.0770456	-0.196233	0.0513762	0.0765559	-0.164083	-0.0372166	-0.0513762	-0.0161294	0.150927	0.161894	0.033391	0.205646	0.200812	0.13714	0.220807	0.182323	0.146486	-0.0764745	-0.0171566	0.0390748	-0.0513762	-0.062631	0.243086	1	0.0742278
qacC/D	0.0216645	-0.175655	0.0222222	-0.062963	-0.0286299	0.185924	-0.057735	0.153077	-0.099794	0.192593	-0.0160375	0.0869756	-0.0581064	0.43305	0.288409	0.265908	0.220885	-0.0683986	0.159702	0.137853	0.0269374	0.278769	-0.00306339	-0.0867467	-0.0196116	0.0869756	0.122847	0.52042	0.0742278	1
AX, amoxicillin; AMC, amoxicillin-clavulanic acid; CFP, cefoperazone; S, streptomycin; CIP, ciprofloxacin; TE, tetracycline; E, erythromycin; NEO, neomycin ; P, penicillin; AMP, ampicillin; GEN, gentamycin; C, chloramphenicol; K, kanamycin; SXT, trimethoprim-sulfamethoxazole

## Sheet: P-value
Table S2 b. Significance and correlations among pairs of the of the four features under study.
	sua	pauA	skc	cfu	opp	AX	AMC	CFP	S	CIP	TE	E	SXT	P	AMP	GEN	NEO	K	C	blaZ	fexA	aac(6')aph (2'')	tet(M)	tet(L)	tet(K)	erm(B)	sul1	qac/ED1	qacA/B	qacC/D
sua
pauA	0.768686
skc	0.323188	0.00787096
cfu	0.323188	0.00787096	0.000582144
opp	0.306377	0.721604	0.11619	0.256828
AX	0.540722	0.330983	0.370161	0.370161	0.0474413
AMC	0.965132	0.471769	0.0906259	0.0906259	0.86618	0.211288
CFP	0.181365	0.92477	0.477318	0.477318	0.359309	0.136915	0.0315644
S	0.877161	0.440596	0.414588	0.373229	0.961989	0.0108345	0.0185301	0.0571771
CIP	0.447971	0.762903	0.856178	0.607276	0.11619	0.327973	0.0906259	0.477318	0.970492
TE	0.0458519	0.0820452	0.463025	0.89594	0.54357	0.358959	0.0208371	0.198584	0.0314551	0.89594
E	0.158771	0.92477	0.550782	0.550782	0.441718	0.385861	0.475291	0.296666	0.780967	0.95475	0.118253
SXT	0.0601778	0.868138	0.920534	0.635321	0.104701	0.114184	0.795447	0.832985	0.357964	0.101536	0.0233404	0.452506
P	0.505722	0.254431	0.142165	0.456259	0.72931	0.63659	0.0731228	0.266618	0.879366	0.0272186	0.484678	0.815889	0.857879
AMP	0.454075	0.0170917	0.145474	0.64966	0.14298	0.91164	0.0421242	0.876782	0.919491	0.145474	0.720709	0.876782	0.192581	0.000250652
GEN	0.598265	0.587905	0.0321128	0.975287	0.72931	0.419504	0.185761	0.112688	0.879366	0.494792	0.935852	0.815889	0.316657	0.0347992	0.68228
NEO	0.909973	0.932707	0.959532	0.525285	0.853039	0.802413	0.378089	0.702826	0.640884	0.593794	0.895114	0.702826	0.437237	0.312492	0.898867	0.00796533
K	0.586175	0.693051	0.0109978	0.576547	0.866823	0.900516	0.438558	0.528909	0.24309	0.467497	0.370065	0.563898	0.628366	0.219681	0.415161	0.155056	0.875883
C	0.000393168	0.818657	0.0283086	0.111175	0.234274	0.77032	0.543083	0.256495	0.97553	0.0119714	0.0557407	0.620956	0.127794	0.674603	0.500278	0.445026	0.77903	0.174335
blaZ	0.0260263	0.662243	0.0176593	0.0768344	0.830077	0.703273	0.350643	0.85107	0.407542	0.237882	0.94825	0.85107	0.0231349	4.76775e-05	0.0743452	0.372987	0.329187	0.0872151	0.104184
fexA	0.16793	0.872924	0.0904372	0.0904372	0.57898	0.960736	0.981028	0.897378	0.762061	0.00466932	0.600486	0.469292	0.453371	0.0443224	0.980048	0.541162	0.638799	0.000842485	2.10381e-07	0.151487
aac(6')aph (2'')	0.829183	0.96684	0.98007	0.258656	0.598725	0.515394	0.94825	0.149116	0.902589	0.548259	0.94825	0.85107	0.88518	0.138565	0.846628	1.46988e-06	0	0.920374	0.857503	0.581198	0.704887
tet(M)	0.237139	0.316588	0.548259	0.237882	0.598725	0.893107	0.94825	0.724721	0.122699	0.582168	1.52145e-08	0.202334	0.076033	0.76492	0.553621	0.138565	0.994419	0.920374	0.208659	0.689364	0.151487	0.380348
tet(L)	0.193139	0.236647	0.478482	0.756863	0.0839717	0.874024	0.0885365	0.677718	0.327973	0.181778	0.0626126	0.677718	0.912784	0.820596	0.586291	0.0595492	0.628938	0.539712	0.269191	0.509687	0.104416	0.303942	0.0168039
tet(K)	0.74381	0.790077	0.872924	0.872924	0.395672	0.811111	0.517393	0.226879	0.471769	0.872924	0.136295	0.268399	0.929844	0.305516	0.495917	0.305516	0.697786	0.307101	0.416532	0.243174	0.34715	0.883139	0.0565023	0.531825
erm(B)	0.158771	0.92477	0.550782	0.550782	0.441718	0.385861	0.475291	0.296666	0.780967	0.95475	0.118253	0	0.452506	0.815889	0.876782	0.815889	0.702826	0.563898	0.620956	0.85107	0.469292	0.85107	0.202334	0.677718	0.268399
sul1	0.141592	0.477789	0.670066	0.670066	0.29482	0.0726243	0.913636	0.962472	0.460708	0.0569006	0.0147074	0.298644	0	0.445026	0.500278	0.445026	0.491168	0.775407	0.13895	0.0247925	0.289397	0.857503	0.0247925	0.556963	0.836536	0.298644
qacED1	0.944965	0.254431	0.456259	0.456259	0.566813	0.63659	0.935852	0.012346	0.879366	0.142165	0.591175	0.365552	0.857879	0.00161032	0.010057	0.0347992	0.0247666	0.219681	0.00411154	0.377628	0.492387	0.00649298	0.372987	0.820596	0.812669	0.365552	0.310446
qacA/B	0.345269	0.311926	0.89859	0.177908	0.641531	0.529196	0.106093	0.675038	0.531825	0.177908	0.761431	0.675038	0.895347	0.215754	0.183844	0.785334	0.0900391	0.0980272	0.261148	0.0682692	0.133764	0.229724	0.532263	0.888723	0.7499	0.675038	0.609176	0.044153
qacC/D	0.859751	0.148824	0.856178	0.607276	0.815357	0.126126	0.637487	0.20921	0.414588	0.112864	0.89594	0.477318	0.635321	0.000201949	0.0162503	0.0272186	0.068169	0.576547	0.189933	0.258656	0.826096	0.0203674	0.98007	0.478482	0.872924	0.477318	0.314598	4.5706e-06	0.544412
AX, amoxicillin; AMC, amoxicillin-clavulanic acid; CFP, cefoperazone; S, streptomycin; CIP, ciprofloxacin; TE, tetracycline; E, erythromycin; NEO, neomycin ; P, penicillin; AMP, ampicillin; GEN, gentamycin; C, chloramphenicol; K, kanamycin; SXT, trimethoprim-sulfamethoxazole
