# Supplementary material for: Environmental Streptococcus uberis Associated with Clinical Mastitis in Dairy Cows: Virulence Traits, Antimicrobial and Biocide Resistance, and Epidemiological Typing
Source: Animals (Basel). 2021 Jun 22;11(7):1849. doi: 10.3390/ani11071849 (PMC8300258; doi:10.3390/ani11071849)
Supplement: Supplementary file 1 [file animals-11-01849-s001.zip › Table S3.xlsx]

## Sheet: 5
Table S3. Calculated binary distances among isolates based on the presence or absence of the four-studied features.
	Iso. 1	Iso. 2	Iso. 3	Iso. 4	Iso. 5	Iso. 6	Iso. 7	Iso. 8	Iso. 9	Iso. 10	Iso. 11	Iso. 12	Iso. 13	Iso. 14	Iso. 15	Iso. 16	Iso. 17	Iso. 18	Iso. 19	Iso. 20	Iso. 21	Iso. 22	Iso. 23	Iso. 24	Iso. 25	Iso. 26	Iso. 27	Iso. 28	Iso. 29	Iso. 30	Iso. 31	Iso. 32	Iso. 33	Iso. 34	Iso. 35	Iso. 36	Iso. 37	Iso. 38	Iso. 39	Iso. 40	Iso. 41	Iso. 42	Iso. 43	Iso. 44	Iso. 45	Iso. 46	Iso. 47	Iso. 48	Iso. 49
Iso. 1	0
Iso. 2	0.47619	0
Iso. 3	0.333333	0.3	0
Iso. 4	0.461538	0.37037	0.384615	0
Iso. 5	0.473684	0.565217	0.590909	0.481481	0
Iso. 6	0.4	0.526316	0.470588	0.615385	0.611111	0
Iso. 7	0.5	0.576923	0.541667	0.5	0.521739	0.55	0
Iso. 8	0.1875	0.428571	0.368421	0.423077	0.333333	0.4375	0.521739	0
Iso. 9	0.526316	0.545455	0.5	0.461538	0.473684	0.5	0.35	0.55	0
Iso. 10	0.473684	0.565217	0.52381	0.481481	0.421053	0.333333	0.521739	0.333333	0.55	0
Iso. 11	0.473684	0.5	0.590909	0.481481	0.571429	0.611111	0.521739	0.5	0.388889	0.571429	0
Iso. 12	0.5	0.52381	0.55	0.655172	0.444444	0.466667	0.545455	0.526316	0.578947	0.526316	0.666667	0
Iso. 13	0.5	0.454545	0.608696	0.5	0.45	0.555556	0.653846	0.52381	0.636364	0.45	0.52381	0.388889	0
Iso. 14	0.571429	0.521739	0.608696	0.551724	0.52381	0.631579	0.6	0.590909	0.636364	0.590909	0.52381	0.294118	0.315789	0
Iso. 15	0.176471	0.409091	0.263158	0.346154	0.47619	0.411765	0.434783	0.222222	0.368421	0.4	0.4	0.5	0.5	0.5	0
Iso. 16	0.45	0.6	0.625	0.464286	0.47619	0.578947	0.434783	0.47619	0.45	0.47619	0.47619	0.695652	0.625	0.730769	0.521739	0
Iso. 17	0.363636	0.571429	0.538462	0.4	0.52	0.608696	0.423077	0.458333	0.5	0.62963	0.52	0.541667	0.538462	0.48	0.375	0.5	0
Iso. 18	0.428571	0.458333	0.541667	0.269231	0.380952	0.681818	0.48	0.454545	0.35	0.64	0.3	0.608696	0.478261	0.478261	0.363636	0.5	0.36	0
Iso. 19	0.526316	0.608696	0.636364	0.518519	0.388889	0.666667	0.68	0.55	0.6	0.619048	0.55	0.5	0.421053	0.333333	0.52381	0.652174	0.56	0.35	0
Iso. 20	0.52381	0.541667	0.625	0.464286	0.315789	0.65	0.56	0.47619	0.52381	0.47619	0.47619	0.5	0.35	0.428571	0.454545	0.583333	0.5	0.363636	0.368421	0
Iso. 21	0.363636	0.461538	0.48	0.222222	0.318182	0.608696	0.481481	0.318182	0.5	0.458333	0.458333	0.6	0.48	0.538462	0.375	0.44	0.37037	0.217391	0.434783	0.44	0
Iso. 22	0.545455	0.5	0.64	0.533333	0.428571	0.666667	0.576923	0.5	0.608696	0.565217	0.428571	0.368421	0.380952	0.210526	0.478261	0.703704	0.4	0.391304	0.4	0.333333	0.461538	0
Iso. 23	0.578947	0.52381	0.681818	0.555556	0.444444	0.5625	0.608696	0.526316	0.5	0.444444	0.25	0.555556	0.388889	0.388889	0.5	0.636364	0.6	0.4	0.411765	0.333333	0.478261	0.277778	0
Iso. 24	0.35	0.52	0.478261	0.333333	0.380952	0.55	0.538462	0.380952	0.5	0.454545	0.454545	0.545455	0.478261	0.478261	0.285714	0.56	0.423077	0.272727	0.263158	0.363636	0.217391	0.391304	0.4	0
Iso. 25	0.434783	0.461538	0.48	0.4	0.576923	0.608696	0.535714	0.458333	0.56	0.576923	0.458333	0.478261	0.48	0.416667	0.375	0.655172	0.307692	0.36	0.5	0.5	0.307692	0.333333	0.478261	0.291667	0
Iso. 26	0.592593	0.5	0.62069	0.387097	0.5	0.692308	0.517241	0.607143	0.592593	0.607143	0.555556	0.458333	0.4	0.4	0.586207	0.535714	0.413793	0.407407	0.48	0.481481	0.413793	0.384615	0.576923	0.517241	0.466667	0
Iso. 27	0.48	0.5	0.461538	0.214286	0.375	0.583333	0.517241	0.44	0.48	0.44	0.5	0.576923	0.518519	0.518519	0.36	0.481481	0.466667	0.346154	0.416667	0.481481	0.230769	0.5	0.52	0.208333	0.413793	0.4	0
Iso. 28	0.535714	0.448276	0.517241	0.172414	0.444444	0.62963	0.5625	0.444444	0.535714	0.444444	0.5	0.62069	0.407407	0.517241	0.428571	0.482759	0.419355	0.357143	0.481481	0.428571	0.25	0.5	0.518519	0.357143	0.366667	0.3	0.178571	0
Iso. 29	0.590909	0.541667	0.625	0.464286	0.545455	0.65	0.615385	0.608696	0.590909	0.666667	0.545455	0.5	0.428571	0.263158	0.521739	0.692308	0.5	0.363636	0.277778	0.454545	0.5	0.409091	0.5	0.434783	0.5	0.423077	0.481481	0.482759	0
Iso. 30	0.5	0.454545	0.545455	0.384615	0.52381	0.375	0.478261	0.45	0.421053	0.368421	0.368421	0.619048	0.47619	0.47619	0.35	0.565217	0.48	0.409091	0.5	0.428571	0.416667	0.454545	0.294118	0.333333	0.48	0.571429	0.4	0.407407	0.428571	0
Iso. 31	0.5	0.391304	0.541667	0.333333	0.380952	0.619048	0.538462	0.380952	0.565217	0.521739	0.454545	0.608696	0.478261	0.478261	0.434783	0.56	0.481481	0.347826	0.428571	0.363636	0.36	0.391304	0.4	0.347826	0.481481	0.566667	0.407407	0.413793	0.434783	0.333333	0
Iso. 32	0.478261	0.44	0.52	0.321429	0.5	0.52381	0.571429	0.434783	0.6	0.434783	0.5	0.583333	0.391304	0.52	0.416667	0.538462	0.464286	0.4	0.478261	0.416667	0.346154	0.44	0.521739	0.333333	0.464286	0.333333	0.333333	0.285714	0.416667	0.318182	0.4	0
Iso. 33	0.5	0.464286	0.481481	0.3	0.62069	0.6	0.482759	0.518519	0.5	0.571429	0.518519	0.538462	0.481481	0.481481	0.384615	0.6	0.321429	0.37037	0.555556	0.5	0.37931	0.464286	0.592593	0.37037	0.192308	0.419355	0.419355	0.322581	0.384615	0.423077	0.482759	0.357143	0
Iso. 34	0.619048	0.565217	0.708333	0.481481	0.5	0.611111	0.64	0.571429	0.619048	0.571429	0.5	0.666667	0.45	0.590909	0.666667	0.545455	0.576923	0.454545	0.473684	0.545455	0.458333	0.565217	0.444444	0.521739	0.576923	0.5	0.5	0.444444	0.47619	0.45	0.454545	0.5	0.571429	0
Iso. 35	0.478261	0.5	0.52	0.321429	0.615385	0.590909	0.4	0.5	0.478261	0.56	0.363636	0.64	0.62963	0.52	0.416667	0.538462	0.346154	0.333333	0.541667	0.538462	0.346154	0.44	0.454545	0.333333	0.28	0.5	0.448276	0.451613	0.48	0.318182	0.4	0.444444	0.296296	0.5	0
Iso. 36	0.541667	0.5	0.62963	0.483871	0.5	0.590909	0.571429	0.5	0.6	0.56	0.56	0.521739	0.458333	0.458333	0.48	0.48	0.407407	0.518519	0.541667	0.48	0.517241	0.5	0.583333	0.518519	0.517241	0.5	0.448276	0.4	0.347826	0.458333	0.4	0.444444	0.413793	0.5	0.551724	0
Iso. 37	0.428571	0.52	0.541667	0.448276	0.380952	0.55	0.592593	0.380952	0.565217	0.454545	0.521739	0.545455	0.409091	0.478261	0.363636	0.615385	0.291667	0.416667	0.428571	0.285714	0.36	0.318182	0.4	0.272727	0.36	0.517241	0.407407	0.357143	0.5	0.333333	0.347826	0.333333	0.428571	0.521739	0.461538	0.4	0
Iso. 38	0.56	0.4	0.592593	0.4	0.458333	0.608696	0.481481	0.458333	0.56	0.52	0.52	0.478261	0.416667	0.347826	0.44	0.555556	0.37037	0.423077	0.5	0.44	0.428571	0.333333	0.478261	0.423077	0.37037	0.466667	0.413793	0.366667	0.375	0.347826	0.291667	0.407407	0.321429	0.458333	0.407407	0.208333	0.36	0
Iso. 39	0.555556	0.636364	0.6	0.538462	0.578947	0.533333	0.652174	0.578947	0.555556	0.578947	0.5	0.684211	0.6	0.526316	0.55	0.619048	0.521739	0.52381	0.470588	0.473684	0.583333	0.571429	0.4375	0.52381	0.64	0.615385	0.56	0.555556	0.473684	0.352941	0.52381	0.565217	0.62963	0.411765	0.5	0.565217	0.45	0.583333	0
Iso. 40	0.363636	0.461538	0.416667	0.285714	0.458333	0.545455	0.423077	0.318182	0.434783	0.458333	0.391304	0.6	0.538462	0.538462	0.227273	0.44	0.37037	0.36	0.56	0.375	0.307692	0.518519	0.541667	0.36	0.428571	0.516129	0.296296	0.310345	0.5	0.347826	0.36	0.346154	0.37931	0.576923	0.407407	0.346154	0.36	0.37037	0.521739	0
Iso. 41	0.625	0.52	0.653846	0.548387	0.583333	0.55	0.416667	0.583333	0.5	0.521739	0.521739	0.545455	0.6	0.478261	0.5	0.56	0.423077	0.538462	0.625	0.5	0.586207	0.391304	0.47619	0.538462	0.535714	0.517241	0.566667	0.5625	0.434783	0.333333	0.48	0.461538	0.428571	0.583333	0.4	0.333333	0.416667	0.291667	0.52381	0.481481	0
Iso. 42	0.4	0.5	0.521739	0.428571	0.428571	0.526316	0.458333	0.35	0.545455	0.5	0.5	0.45	0.521739	0.380952	0.333333	0.6	0.26087	0.391304	0.47619	0.333333	0.4	0.285714	0.45	0.318182	0.333333	0.5	0.444444	0.448276	0.409091	0.3	0.318182	0.375	0.346154	0.565217	0.304348	0.375	0.238095	0.26087	0.421053	0.333333	0.318182	0
Iso. 43	0.571429	0.64	0.608696	0.551724	0.590909	0.714286	0.363636	0.590909	0.45	0.666667	0.4	0.619048	0.666667	0.47619	0.5	0.583333	0.416667	0.409091	0.571429	0.428571	0.538462	0.454545	0.5	0.541667	0.48	0.571429	0.62069	0.612903	0.428571	0.5	0.541667	0.62963	0.423077	0.608696	0.347826	0.52	0.541667	0.48	0.473684	0.416667	0.363636	0.380952	0
Iso. 44	0.363636	0.571429	0.538462	0.4	0.52	0.608696	0.423077	0.391304	0.56	0.576923	0.52	0.541667	0.538462	0.48	0.375	0.5	0.166667	0.423077	0.56	0.44	0.37037	0.461538	0.6	0.423077	0.307692	0.516129	0.466667	0.419355	0.5	0.48	0.423077	0.517241	0.321429	0.52	0.346154	0.346154	0.36	0.307692	0.521739	0.24	0.481481	0.26087	0.347826	0
Iso. 45	0.409091	0.5	0.52	0.321429	0.434783	0.652174	0.461538	0.363636	0.478261	0.5	0.434783	0.64	0.458333	0.576923	0.347826	0.416667	0.346154	0.333333	0.541667	0.272727	0.346154	0.5	0.521739	0.4	0.407407	0.548387	0.448276	0.344828	0.538462	0.458333	0.333333	0.444444	0.357143	0.5	0.444444	0.384615	0.333333	0.346154	0.565217	0.208333	0.518519	0.375	0.391304	0.208333	0
Iso. 46	0.521739	0.538462	0.615385	0.413793	0.409091	0.636364	0.555556	0.409091	0.583333	0.478261	0.541667	0.565217	0.434783	0.5	0.458333	0.52	0.384615	0.44	0.521739	0.318182	0.444444	0.416667	0.5	0.44	0.444444	0.533333	0.482759	0.37931	0.391304	0.434783	0.304348	0.423077	0.333333	0.478261	0.481481	0.217391	0.304348	0.25	0.545455	0.384615	0.375	0.272727	0.434783	0.32	0.217391	0
Iso. 47	0.3	0.538462	0.5	0.296296	0.478261	0.571429	0.44	0.409091	0.454545	0.541667	0.478261	0.625	0.5	0.56	0.318182	0.391304	0.25	0.304348	0.521739	0.318182	0.32	0.538462	0.565217	0.375	0.444444	0.482759	0.428571	0.37931	0.52	0.434783	0.44	0.423077	0.392857	0.6	0.423077	0.481481	0.375	0.5	0.47619	0.25	0.555556	0.347826	0.434783	0.25	0.217391	0.4	0
Iso. 48	0.333333	0.5	0.458333	0.321429	0.434783	0.590909	0.333333	0.363636	0.409091	0.56	0.434783	0.521739	0.576923	0.458333	0.272727	0.48	0.130435	0.26087	0.541667	0.416667	0.28	0.375	0.521739	0.333333	0.28	0.448276	0.392857	0.4	0.48	0.391304	0.4	0.444444	0.296296	0.615385	0.25	0.444444	0.333333	0.346154	0.5	0.28	0.4	0.142857	0.318182	0.208333	0.32	0.36	0.217391	0
Iso. 49	0.454545	0.48	0.434783	0.357143	0.478261	0.636364	0.375	0.478261	0.380952	0.6	0.478261	0.625	0.56	0.5	0.318182	0.52	0.32	0.304348	0.521739	0.391304	0.384615	0.48	0.565217	0.44	0.5	0.482759	0.428571	0.433333	0.458333	0.434783	0.44	0.423077	0.448276	0.653846	0.481481	0.481481	0.375	0.444444	0.545455	0.25	0.44	0.416667	0.363636	0.384615	0.291667	0.461538	0.26087	0.291667	0
Iso. 50	0.5	0.464286	0.535714	0.354839	0.4	0.703704	0.428571	0.461538	0.5	0.571429	0.518519	0.538462	0.586207	0.481481	0.444444	0.444444	0.321429	0.37037	0.555556	0.444444	0.321429	0.407407	0.538462	0.428571	0.37931	0.46875	0.419355	0.424242	0.5	0.535714	0.37037	0.5625	0.387097	0.62069	0.357143	0.357143	0.428571	0.321429	0.62963	0.37931	0.37037	0.346154	0.36	0.321429	0.357143	0.333333	0.392857	0.230769	0.392857
Iso. 51	0.565217	0.52	0.6	0.448276	0.380952	0.681818	0.48	0.454545	0.565217	0.583333	0.521739	0.47619	0.541667	0.409091	0.5	0.615385	0.423077	0.416667	0.5	0.285714	0.481481	0.318182	0.47619	0.48	0.481481	0.464286	0.464286	0.466667	0.434783	0.478261	0.347826	0.518519	0.482759	0.454545	0.461538	0.4	0.416667	0.291667	0.45	0.36	0.416667	0.238095	0.333333	0.291667	0.333333	0.304348	0.44	0.333333	0.44
Iso. 52	0.4	0.5	0.521739	0.428571	0.5	0.444444	0.458333	0.428571	0.545455	0.5	0.565217	0.368421	0.454545	0.3	0.333333	0.6	0.26087	0.458333	0.47619	0.409091	0.461538	0.363636	0.52381	0.391304	0.4	0.444444	0.444444	0.448276	0.333333	0.3	0.391304	0.375	0.346154	0.565217	0.375	0.304348	0.318182	0.26087	0.421053	0.333333	0.318182	0.105263	0.454545	0.26087	0.44	0.347826	0.347826	0.227273	0.416667
Iso. 53	0.478261	0.555556	0.52	0.37931	0.56	0.52381	0.181818	0.5	0.333333	0.5	0.434783	0.583333	0.62963	0.52	0.347826	0.48	0.28	0.4	0.653846	0.48	0.407407	0.5	0.521739	0.461538	0.407407	0.5	0.448276	0.451613	0.538462	0.318182	0.518519	0.5	0.357143	0.615385	0.25	0.5	0.461538	0.407407	0.5	0.28	0.333333	0.304348	0.272727	0.28	0.384615	0.481481	0.291667	0.173913	0.291667
Iso. 54	0.363636	0.461538	0.416667	0.222222	0.391304	0.608696	0.423077	0.318182	0.434783	0.52	0.458333	0.653846	0.592593	0.592593	0.304348	0.44	0.307692	0.291667	0.56	0.375	0.24	0.518519	0.541667	0.36	0.428571	0.516129	0.296296	0.310345	0.555556	0.416667	0.36	0.464286	0.433333	0.52	0.407407	0.464286	0.36	0.428571	0.454545	0.166667	0.535714	0.333333	0.416667	0.24	0.208333	0.384615	0.173913	0.208333	0.25
Iso. 55	0.583333	0.538462	0.615385	0.413793	0.478261	0.695652	0.5	0.6	0.380952	0.6	0.333333	0.68	0.5	0.56	0.52	0.52	0.384615	0.304348	0.521739	0.458333	0.384615	0.416667	0.35	0.44	0.444444	0.482759	0.482759	0.433333	0.576923	0.434783	0.44	0.535714	0.5	0.478261	0.36	0.586207	0.375	0.5	0.545455	0.5	0.5	0.538462	0.458333	0.5	0.423077	0.518519	0.461538	0.423077	0.4
Iso. 56	0.576923	0.535714	0.655172	0.419355	0.347826	0.68	0.5	0.48	0.576923	0.538462	0.538462	0.56	0.44	0.44	0.518519	0.571429	0.392857	0.384615	0.458333	0.333333	0.333333	0.36	0.434783	0.384615	0.392857	0.483871	0.37931	0.333333	0.4	0.44	0.32	0.482759	0.4	0.48	0.482759	0.307692	0.32	0.269231	0.6	0.392857	0.444444	0.36	0.44	0.333333	0.307692	0.208333	0.407407	0.37037	0.407407
Iso. 57	0.666667	0.580645	0.645161	0.424242	0.535714	0.714286	0.392857	0.633333	0.461538	0.586207	0.423077	0.607143	0.551724	0.5	0.566667	0.517241	0.451613	0.448276	0.62069	0.517241	0.451613	0.482759	0.5	0.548387	0.451613	0.387097	0.387097	0.34375	0.517241	0.5	0.548387	0.575758	0.40625	0.481481	0.433333	0.433333	0.548387	0.4	0.592593	0.4	0.448276	0.533333	0.346154	0.4	0.433333	0.466667	0.516129	0.433333	0.466667
Iso. 58	0.586207	0.548387	0.612903	0.393939	0.5	0.62963	0.516129	0.551724	0.633333	0.551724	0.6	0.518519	0.464286	0.407407	0.533333	0.580645	0.366667	0.516129	0.535714	0.482759	0.419355	0.448276	0.571429	0.466667	0.419355	0.354839	0.3	0.258065	0.428571	0.464286	0.466667	0.451613	0.375	0.5	0.5	0.285714	0.413793	0.310345	0.555556	0.366667	0.466667	0.392857	0.517241	0.310345	0.451613	0.37931	0.433333	0.4	0.483871
Iso. 59	0.5	0.461538	0.538462	0.344828	0.458333	0.545455	0.586207	0.52	0.56	0.52	0.52	0.541667	0.347826	0.416667	0.44	0.555556	0.37037	0.423077	0.434783	0.44	0.37037	0.461538	0.478261	0.36	0.428571	0.357143	0.230769	0.185185	0.44	0.347826	0.423077	0.346154	0.433333	0.458333	0.517241	0.346154	0.291667	0.37037	0.454545	0.37037	0.535714	0.4	0.642857	0.428571	0.464286	0.444444	0.384615	0.407407	0.444444
Iso. 60	0.615385	0.518519	0.592593	0.344828	0.52	0.666667	0.586207	0.62963	0.615385	0.576923	0.576923	0.6	0.416667	0.416667	0.555556	0.555556	0.533333	0.423077	0.363636	0.44	0.428571	0.518519	0.541667	0.423077	0.533333	0.296296	0.296296	0.25	0.375	0.48	0.423077	0.346154	0.483871	0.52	0.566667	0.464286	0.481481	0.482759	0.521739	0.482759	0.586207	0.518519	0.642857	0.580645	0.517241	0.5	0.444444	0.517241	0.444444
Iso. 61	0.517241	0.483871	0.5	0.225806	0.533333	0.655172	0.451613	0.533333	0.517241	0.533333	0.482759	0.551724	0.5	0.448276	0.413793	0.516129	0.354839	0.344828	0.517241	0.466667	0.3	0.433333	0.551724	0.344828	0.3	0.233333	0.233333	0.193548	0.413793	0.448276	0.5	0.333333	0.2	0.580645	0.333333	0.4375	0.451613	0.40625	0.586207	0.354839	0.451613	0.37931	0.448276	0.40625	0.4375	0.419355	0.366667	0.275862	0.419355
Iso. 62	0.607143	0.612903	0.677419	0.354839	0.518519	0.703704	0.37037	0.571429	0.5	0.518519	0.461538	0.642857	0.586207	0.535714	0.551724	0.444444	0.37931	0.37037	0.555556	0.5	0.321429	0.407407	0.48	0.428571	0.37931	0.366667	0.419355	0.375	0.551724	0.481481	0.428571	0.466667	0.387097	0.518519	0.296296	0.5625	0.482759	0.433333	0.62963	0.483871	0.428571	0.464286	0.444444	0.433333	0.413793	0.448276	0.448276	0.357143	0.448276
Iso. 63	0.461538	0.580645	0.6	0.322581	0.535714	0.666667	0.5	0.535714	0.571429	0.586207	0.535714	0.555556	0.444444	0.444444	0.464286	0.517241	0.153846	0.333333	0.461538	0.464286	0.285714	0.37037	0.555556	0.333333	0.222222	0.275862	0.387097	0.290323	0.464286	0.5	0.5	0.37931	0.241379	0.535714	0.321429	0.483871	0.333333	0.4	0.592593	0.451613	0.5	0.37037	0.5	0.285714	0.37931	0.413793	0.296296	0.259259	0.413793
Iso. 64	0.545455	0.5	0.64	0.428571	0.263158	0.666667	0.576923	0.5	0.47619	0.565217	0.428571	0.52381	0.380952	0.380952	0.478261	0.6	0.4	0.238095	0.315789	0.25	0.333333	0.2	0.277778	0.318182	0.461538	0.384615	0.384615	0.392857	0.409091	0.380952	0.318182	0.375	0.517241	0.5	0.5	0.5	0.238095	0.4	0.5	0.461538	0.458333	0.363636	0.521739	0.518519	0.44	0.416667	0.416667	0.375	0.347826
Iso. 65	0.590909	0.6	0.68	0.517241	0.4	0.714286	0.56	0.608696	0.590909	0.666667	0.545455	0.421053	0.428571	0.166667	0.583333	0.64	0.375	0.363636	0.277778	0.380952	0.44	0.25	0.421053	0.434783	0.44	0.36	0.481481	0.482759	0.3	0.5	0.434783	0.538462	0.5	0.545455	0.48	0.48	0.434783	0.375	0.473684	0.555556	0.5	0.333333	0.428571	0.44	0.538462	0.458333	0.458333	0.347826	0.458333
Iso. 66	0.545455	0.5	0.64	0.428571	0.263158	0.666667	0.52	0.5	0.47619	0.565217	0.428571	0.52381	0.380952	0.380952	0.478261	0.6	0.461538	0.238095	0.315789	0.157895	0.333333	0.285714	0.277778	0.318182	0.461538	0.444444	0.384615	0.392857	0.409091	0.380952	0.318182	0.44	0.517241	0.5	0.5	0.5	0.318182	0.4	0.5	0.4	0.52	0.363636	0.454545	0.461538	0.375	0.416667	0.347826	0.375	0.347826
Iso. 67	0.571429	0.580645	0.645161	0.322581	0.481481	0.666667	0.548387	0.481481	0.62069	0.535714	0.535714	0.607143	0.551724	0.5	0.517241	0.517241	0.344828	0.392857	0.518519	0.464286	0.344828	0.37037	0.555556	0.392857	0.4	0.333333	0.333333	0.290323	0.407407	0.444444	0.392857	0.259259	0.3	0.535714	0.37931	0.37931	0.392857	0.344828	0.592593	0.4	0.392857	0.307692	0.5	0.4	0.433333	0.296296	0.413793	0.321429	0.466667
Iso. 68	0.6	0.555556	0.678571	0.433333	0.434783	0.708333	0.518519	0.56	0.541667	0.615385	0.434783	0.521739	0.458333	0.391304	0.538462	0.538462	0.407407	0.333333	0.478261	0.347826	0.464286	0.304348	0.454545	0.461538	0.464286	0.333333	0.448276	0.4	0.347826	0.458333	0.4	0.384615	0.357143	0.56	0.444444	0.384615	0.461538	0.346154	0.565217	0.464286	0.4	0.304348	0.391304	0.464286	0.444444	0.291667	0.423077	0.32	0.481481
Iso. 69	0.703704	0.607143	0.724138	0.433333	0.56	0.708333	0.518519	0.666667	0.541667	0.615385	0.5	0.64	0.576923	0.52	0.642857	0.592593	0.464286	0.4	0.541667	0.48	0.517241	0.375	0.454545	0.518519	0.517241	0.392857	0.548387	0.5	0.416667	0.458333	0.461538	0.444444	0.413793	0.5	0.32	0.551724	0.518519	0.464286	0.565217	0.612903	0.333333	0.44	0.416667	0.566667	0.551724	0.423077	0.535714	0.444444	0.535714
[truncated: 20 more columns]
